# Supplementary material for: Efficient integration of secure and safety critical industrial wireless sensor networks
Source: Springer Nature journal article supplement (doi:10.1186/1687-1499-2011-100), 2011-09-18

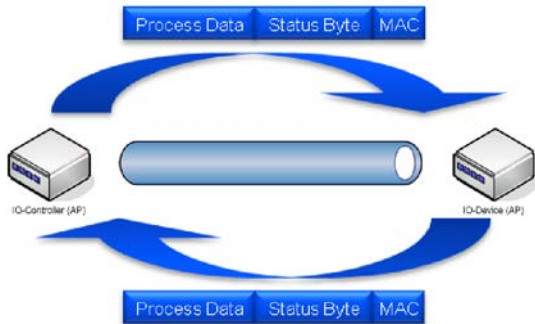

Supplement: 13638_2011_100_MOESM8_ESM.pdf [file 13638_2011_100_MOESM8_ESM.pdf]
